# Supplementary material for: Hydrothermal synthesis and characterization of novel yellow pigments based on V5+ doped BiPO4 with high near-infrared reflectance
Source: Royal Society of Chemistry journal article supplement (doi:10.1039/c8ra02406e), 2018-01-01
Supplement: c8ra02406e1.pdf [file c8ra02406e1.pdf]

## Hydrothermal synthesis and characterization of novel yellow pigments based on

### $V^{5+}$ doped $BiPO_4$ with high near-infrared reflectance

Cheng Ding, Aijun Han\*, Mingquan Ye, Yu Zhang, Lingyun Yao and Jiling Yang

School of Chemical Engineering, Nanjing University of Science and Technology,

Nanjing 210094, China

\* Correspondence: haj@njust.edu.cn (Aijun Han); Tel.: +86-25-84438644

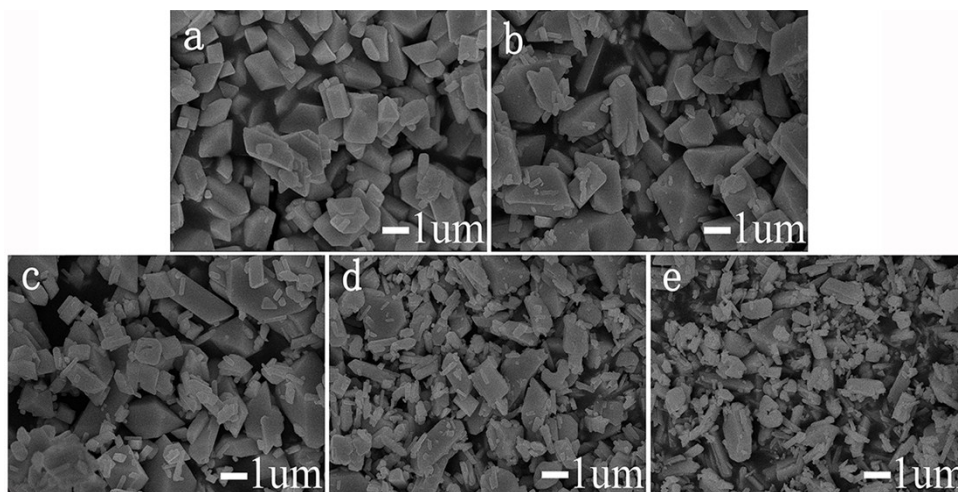

Figure S1: FE-SEM images of  $BiP_{1-x}V_xO_4$  powdered pigments;  $x=(a)$  0.00, (b) 0.05, (c) 0.08, (d) 0.1, and (e) 0.15.
